# Supplementary material for: Cu2NiSnS4/g-C3N4 S-scheme photocatalysts: interfacial surface trap states vs. hydrogen production
Source: Royal Society of Chemistry journal article supplement (doi:10.1039/d4se00744a), 2024-01-01
Supplement: d4se00744a1.pdf [file d4se00744a1.pdf]

## Supplementary information

### **Cu<sub>2</sub>NiSnS<sub>4</sub>/g-C<sub>3</sub>N<sub>4</sub> S-scheme Photocatalysts: Interfacial Surface Trap States vs Hydrogen Production**

Rugma T P<sup>a</sup>, Rishi Krishna B S<sup>†,a</sup>, K. Priyanga Kangeyan<sup>†,a</sup>, Neppolian Bernaurdshaw<sup>b</sup>,  
*Abdullah Saad AlArifi<sup>c</sup>, Sandeep Kumar Lakhera<sup>a\*</sup>*

*<sup>a</sup>Department of Physics and Nanotechnology, SRM IST, Kattankulathur, Chennai- 603203,  
Tamil Nadu, India*

*<sup>b</sup>Department of Chemistry, SRM IST, Kattankulathur, Chennai- 603203, Tamil Nadu, India*

*<sup>c</sup>Department of Chemistry, College of Science, King Saud University, P.O. Box 2455, Riyadh  
11451, Saudi Arabia*

\*Corresponding author: [sandeep1@srmist.edu.in](mailto:sandeep1@srmist.edu.in); [space1lakhera@gmail.com](mailto:space1lakhera@gmail.com)

<sup>†</sup> Equal contribution

#### **Chemicals and characterization techniques used**

The melamine and lead chloride utilized in this study were bought from Sigma Aldrich. Copper chloride, Nickel acetate, Thiourea, and Methanol were supplied by SRL Chemicals, India. The crystalline structure in the 2 range from 10-90° was investigated using a Powder X-ray diffraction (X' port Powder X-ray system). Fourier transform infrared spectroscopy (ATR mode), with a scanning range of 400–4000 cm<sup>-1</sup>, was used to examine the chemical bonding and infrared characteristics. Morphological studies were conducted using HR-SEM (Thermofisher-scientific) and HR-TEM (JEOL, Japan) instruments. A UV-vis spectrometer was used to determine the materials' UV-vis diffuse reflectance spectra (UV-vis DRS, Thermo Scientific). The PL measurements were conducted using a Fluorescence spectrophotometer (F96pro) with a 370 nm excitation wavelength. Fluorescence spectroscopy (FL3-TCSPC), with a laser excitation of 380 nm, was used to perform the Time-Resolved Photoluminescence measurement. Utilizing a device made by Thermo Scientific ((Shimadzu ESCA 3100)), the XPS measurements were made. Using a Micromeritics ASAP 2420 surface area analyzer at liquid nitrogen temperature, the BET surface area measurements were performed.

#### **Photocatalytic activity test**

A suspension of the photocatalyst (5 mg) was prepared in a 50 mL mixture of water and methanol (used as the sacrificial agent) within a glass reactor. To prevent any leakage, the reactor was sealed with a rubber septum, and the mixture was stirred in the dark while being

purged with N<sub>2</sub> gas for 30 minutes. The reactor was then exposed to direct sunlight and continuously stirred using a magnetic stirrer. The experiments were conducted outdoors under natural sunlight conditions with a peak intensity of 65,000 lux ±15%. The light intensity was measured with lux meter. All the samples were placed under sunlight at the same time for comparison and measurements were taken between 10 am and 2 pm to ensure consistent light exposure during peak sunlight hours. The average ambient temperature during the experiments was 35°C. Gases evolved during the reaction were collected every hour using a 250 μL microsyringe and analysed with an offline gas chromatograph (Shimadzu GC-2014, using N<sub>2</sub> as the carrier gas).

### Electrochemical measurements

Photocurrent and impedance responses of the samples were measured using a three-electrode system (comprising a glassy carbon working electrode, a platinum counter electrode, and an Ag/AgCl reference electrode) in a 0.1 M Na<sub>2</sub>SO<sub>4</sub> electrolyte solution. The measurements were conducted on an electrochemical workstation (CHI760E, Chenhua, China). For illumination, a solar simulator equipped with a 300 W Xenon lamp (300WSS-EM) was employed, providing 20-second on-off light pulses.

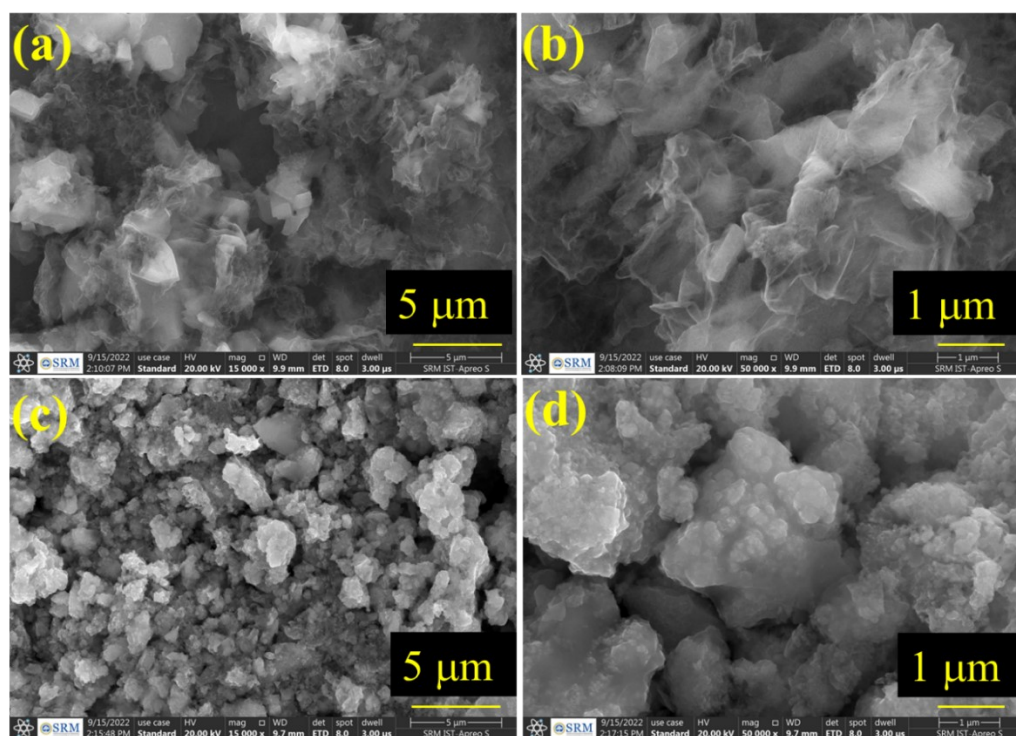

**Figure S1:** HR-SEM images of (a–b) PCN and (c–d) CNTS particles

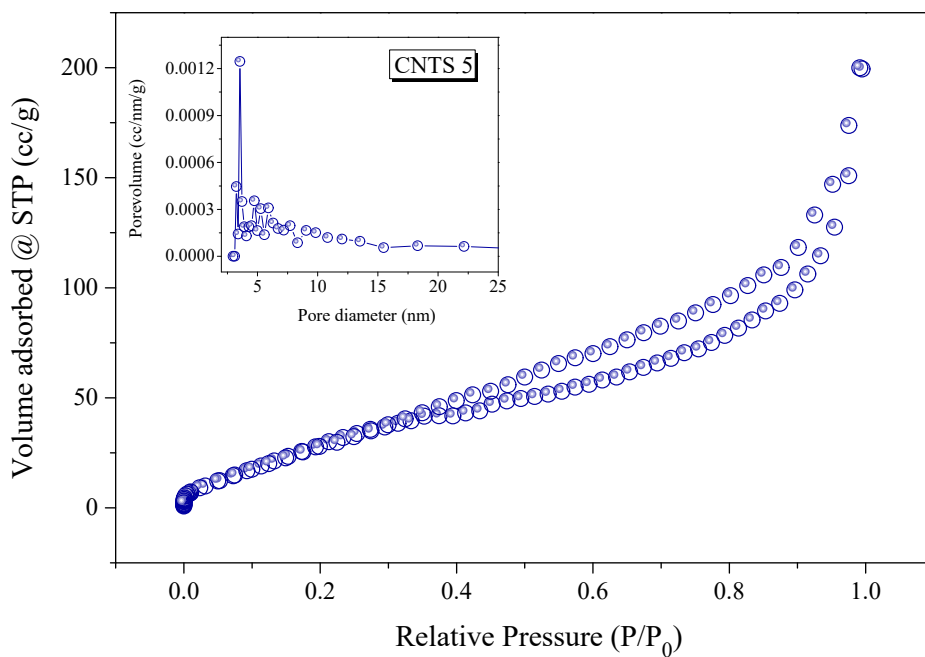

**Figure S2:** The adsorption-desorption isotherms of CNTS 5 samples.

**Table S1:** The specific surface area (SSA) and pore size distribution of PCN and CNTS 5 samples

| Sample Name | Pore size (nm) | Pore volume (cc/g) | Surface area (m <sup>2</sup> /g) |
|-------------|----------------|--------------------|----------------------------------|
| PCN         | 1.745          | 0.377              | 214.3                            |
| CNTS 5      | 1.617          | 0.284              | 140.3                            |

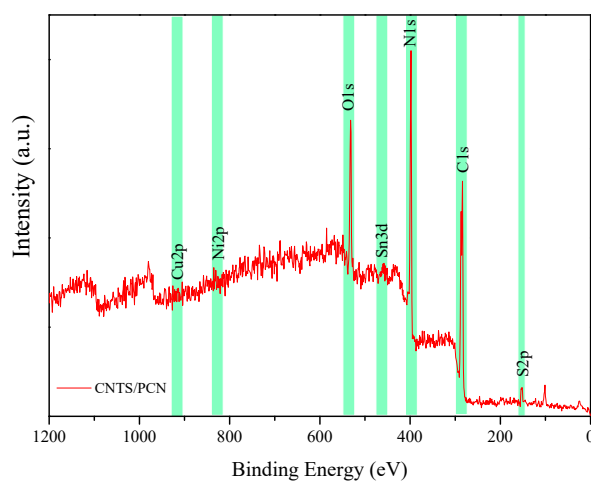

**Figure S3:** XPS survey spectra of CNTS composite photocatalyst

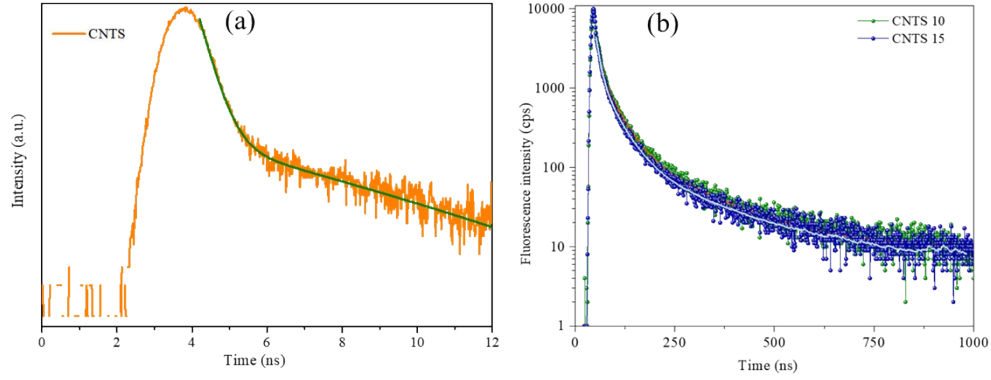

**Figure S4:** (a) TRPL spectra of CNTS photocatalyst, (b) TRPL spectra of CNTS10 and CNTS 15 photocatalysts

**Table S2:** Time constants and lifetimes of the PCN, CNTS and CNTS/PCN photocatalysts

| <b>Samples</b> | <b>B<sub>1</sub></b> | <b>τ<sub>1</sub><br/>(ns)</b> | <b>B<sub>2</sub></b> | <b>τ<sub>2</sub> (ns)</b> | <b>τ<sub>avg</sub><br/>(ns)</b> | <b>χ<sup>2</sup></b> | <b>k<sub>NT</sub><br/>(ns<sup>-1</sup>)</b> | <b>k<sub>ET</sub> (ns<sup>-1</sup>)<br/>w.r.t. PCN</b> |
|----------------|----------------------|-------------------------------|----------------------|---------------------------|---------------------------------|----------------------|---------------------------------------------|--------------------------------------------------------|
| <b>PCN</b>     | 787.38               | 2.50                          | 164.91               | 10                        | 6.24                            | 1.16                 |                                             |                                                        |
| <b>CNTS</b>    | 771.54               | 0.32                          | 51.68                | 4.50                      | 2.34                            | 1.12                 |                                             |                                                        |
| <b>CNTS 3</b>  | 555.53               | 2.00                          | 219.93               | 8.00                      | 5.68                            | 1.17                 | 0.38                                        | 0.02                                                   |
| <b>CNTS 5</b>  | 650.24               | 1.85                          | 195.76               | 8.56                      | 5.76                            | 1.16                 | 0.43                                        | 0.02                                                   |
| <b>CNTS 10</b> | 0.0179               | 4.83                          | 0.0576               | 1.03                      | 2.94                            | 1.18                 | -0.763                                      | 0.19                                                   |
| <b>CNTS 15</b> | 0.4076               | 1.10                          | 0.0016               | 20.70                     | 2.53                            | 1.13                 | 0.86                                        | 0.24                                                   |

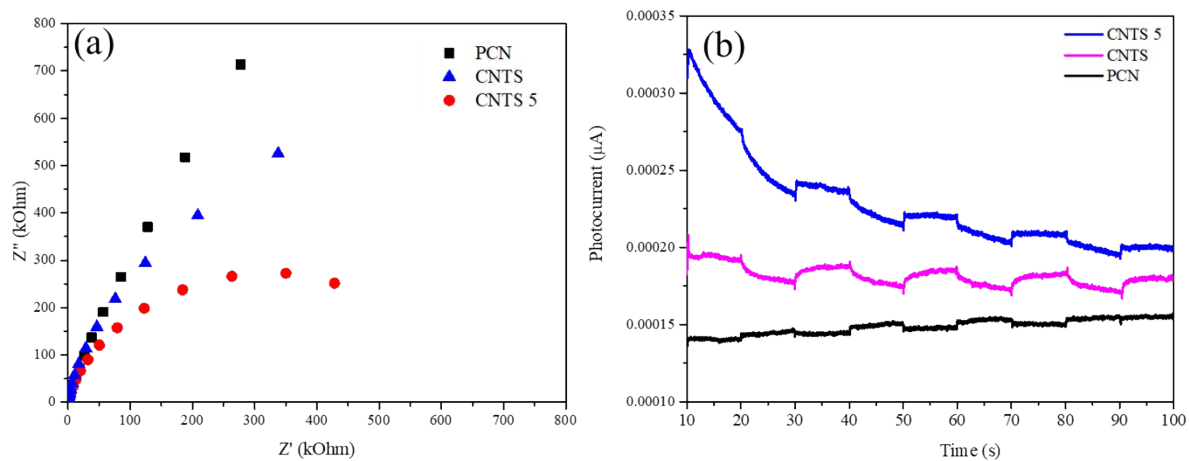

**Figure S5:** (a) EIS and (b) Photocurrent measurements of PCN, CNTS and CNTS 5 photocatalysts

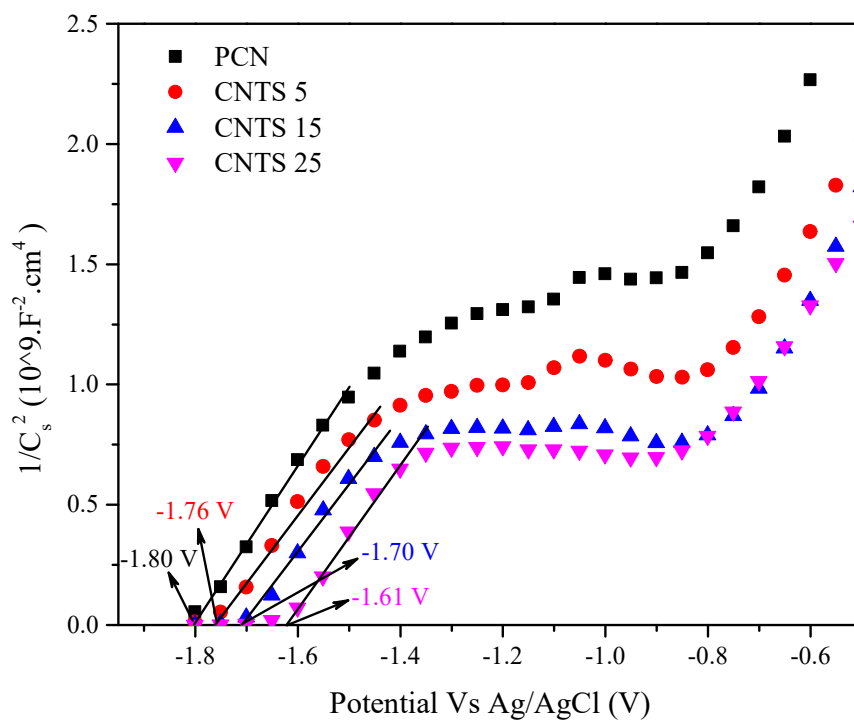

**Figure S6:** Mott-Schottky plot of the CNTS/PCN photocatalysts

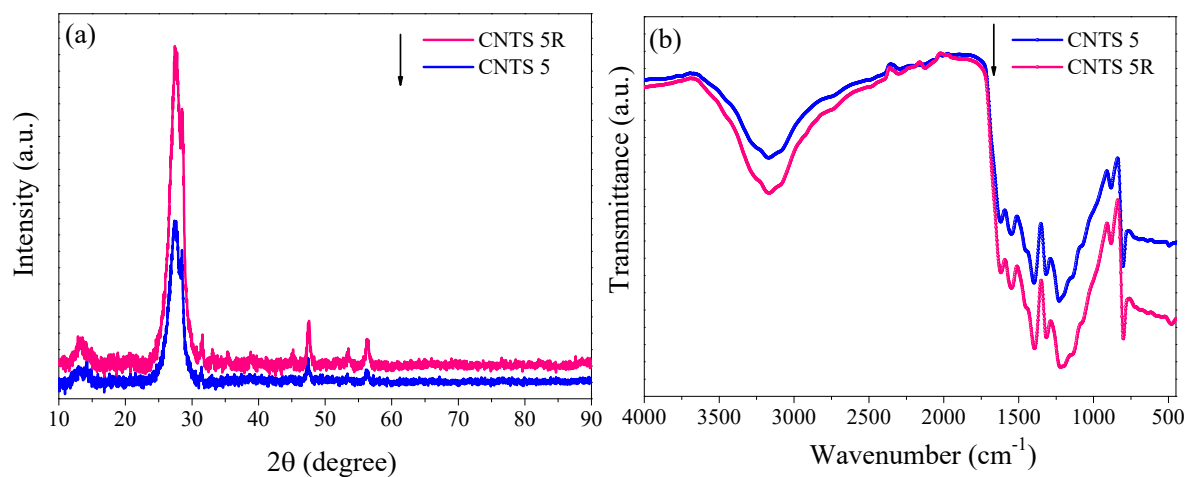

**Figure S7:** (a) X-ray Diffraction patterns and (b) FTIR spectra of PCN and CNTS/PCN photocatalysts before and after the reactions

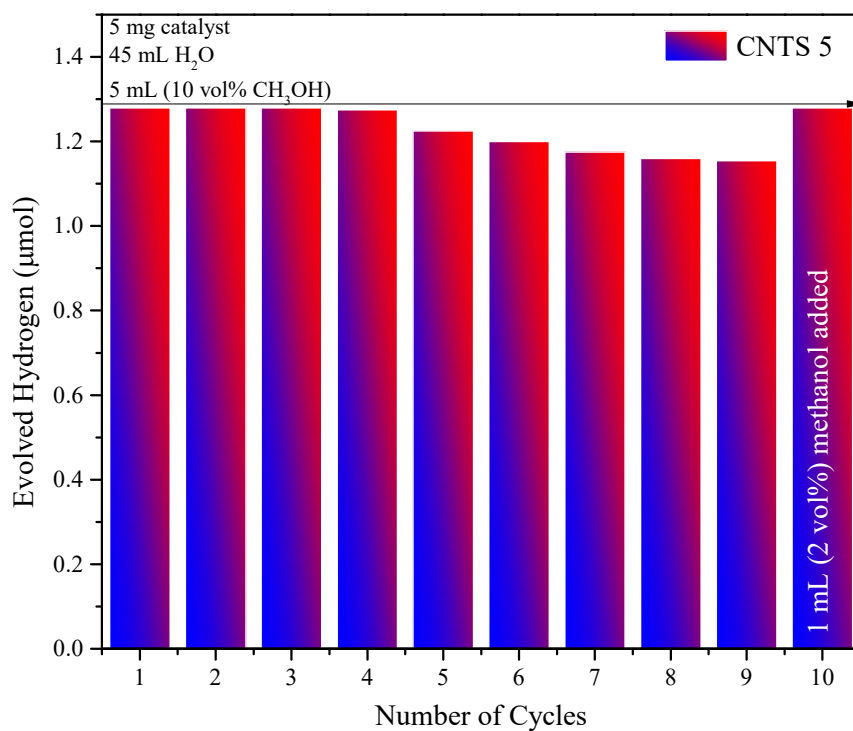

**Figure S8:** Reusability reaction of the CNTS 5 photocatalysts under Xenon lamp (300W) for 4h per cycle

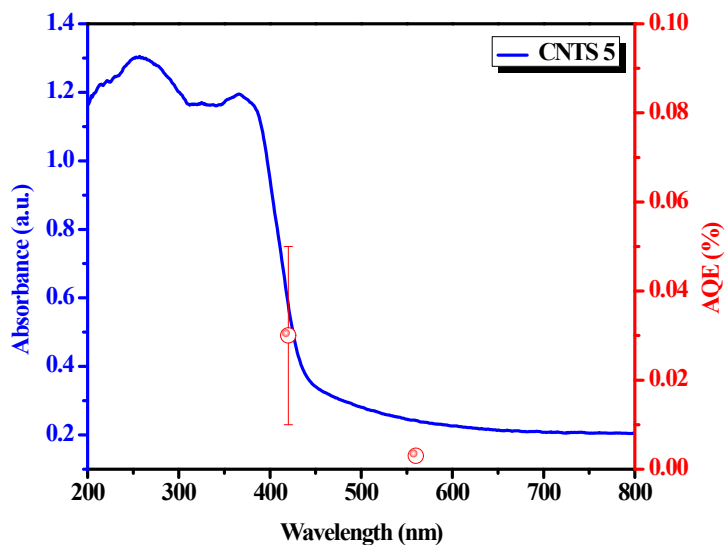

**Fig. S9:** The UV-vis absorption spectra and apparent quantum efficiency (AQE) measurements of CNTS-5 photocatalyst

**Table S3:** Photocatalytic hydrogen evolution activity of  $\text{Cu}_2\text{MSnS}_4$  -based photocatalysts

| S. No | Catalyst                    | Co-Catalyst/Dye sensitizer | Light source                            | Amount of $\text{H}_2$ produced ( $\mu\text{mol h}^{-1} \text{g}^{-1}$ ) | Scavenger | Ref. |
|-------|-----------------------------|----------------------------|-----------------------------------------|--------------------------------------------------------------------------|-----------|------|
| 1     | $\text{Cu}_2\text{NiSnS}_4$ | EY                         | solar simulator (Solar Light XPS 300TM) | 2028                                                                     | TEOA (-)  | [1]  |
| 2     | $\text{Cu}_2\text{FeSnS}_4$ | EY                         | solar simulator (Solar Light XPS 300TM) | 1870                                                                     | TEOA (-)  | [1]  |
| 3     | $\text{Cu}_2\text{CoSnS}_4$ | EY                         | solar simulator (Solar Light XPS 300TM) | 1926                                                                     | TEOA (-)  | [1]  |
| 4     | $\text{Cu}_2\text{ZnSnS}_4$ | EY                         | solar simulator (Solar Light XPS 300TM) | 1420                                                                     | TEOA (-)  | [1]  |

|   |                                    |                                           |                                            |              |                           |                     |
|---|------------------------------------|-------------------------------------------|--------------------------------------------|--------------|---------------------------|---------------------|
| 5 | Cu <sub>2</sub> MnSnS <sub>4</sub> | EY                                        | solar simulator<br>(Solar Light XPS 300TM) | 389          | TEOA (-)                  | [1]                 |
| 6 | TiO <sub>2</sub>                   | Cu <sub>2</sub> NiSnS <sub>4</sub>        | Sunlight                                   | 1786         | Glycerol (5 Vol%)         | [2]                 |
| 7 | g-C <sub>3</sub> N <sub>4</sub>    | Pt/<br>Cu <sub>2</sub> ZnSnS <sub>4</sub> | 400W Xenon lamp                            | 147.2        | -                         | [3]                 |
| 8 | g-C <sub>3</sub> N <sub>4</sub>    | Cu <sub>2</sub> NiSnS <sub>4</sub>        | <b>Direct Sunlight</b>                     | <b>230.3</b> | <b>Methanol (10 Vol%)</b> | <b>Current Work</b> |

## References

1. Gonce, M.K., et al., Dye-Sensitized Cu<sub>2</sub>XSnS<sub>4</sub> (X=Zn, Ni, Fe, Co, and Mn) Nanofibers for Efficient Photocatalytic Hydrogen Evolution. *ChemSusChem*, 2016. **9**(6): p. 600-605
2. Dhileepan MD, Lakhera SK, Neppolian B. Interface engineering of 0D–1D Cu<sub>2</sub>NiSnS<sub>4</sub>/TiO<sub>2</sub> (B) p–n heterojunction nanowires for efficient photocatalytic hydrogen evolution. *Catalysis Today*. 2023, **423**:p.114006.
3. Raza, A., H. Shen, and A.A. Haidry, Novel Cu<sub>2</sub>ZnSnS<sub>4</sub>/Pt/g-C<sub>3</sub>N<sub>4</sub> heterojunction photocatalyst with straddling band configuration for enhanced solar to fuel conversion. *Applied Catalysis B: Environmental*, 2020. **277**: p. 119239.
